# Supplementary material for: SAPO-34 and Zn/ZSM-5 synergistic catalysis of methanol to aromatics from light olefins
Source: Royal Society of Chemistry journal article supplement (doi:10.1039/d2nj00630h), 2022-01-01
Supplement: d2nj00630h1.pdf [file d2nj00630h1.pdf]

## Supplementary information

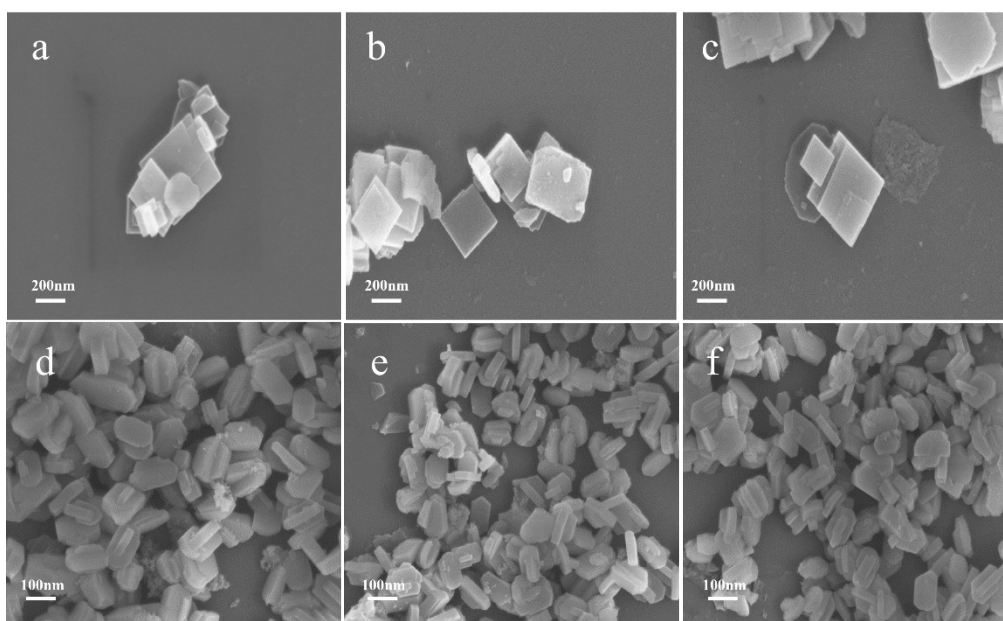

Fig.S1 SEM image of Zn/ZSM-5 and SAPO-34  
(a)SP0.1; (b)SP0.2; (c)SP0.3;(d)1ZnZ30 ; (e)3ZnZ30 ; (f)5ZnZ30

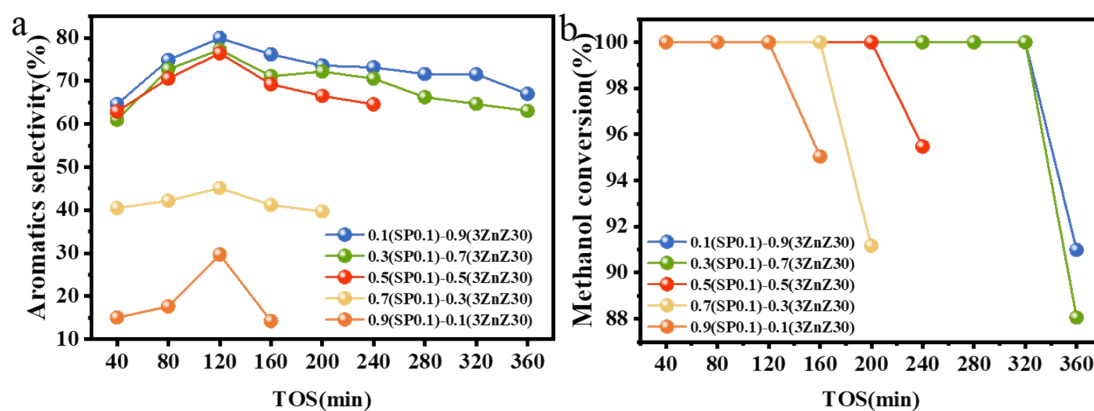

Fig.S2 Effect of layered loading of 3ZnZ30 and SP0.1 with different loading ratio on reaction performance (a) TOS diagram of aromatics selectivity, (b) TOS diagram of methanol conversion, reaction conditions:  $T = 698\text{ K}$ ,  $\text{TOS} = 2\text{ h}$ ,  $\text{WHSV} = 3\text{ h}^{-1}$ .

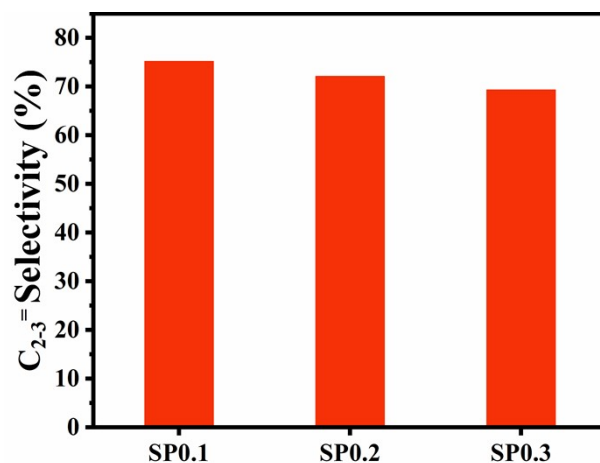

Fig.S3  $C_{2-3}$  selectivity of different SAPO-34, reaction conditions: T = 698 K, TOS = 2 h, WHSV = 3 h<sup>-1</sup>.

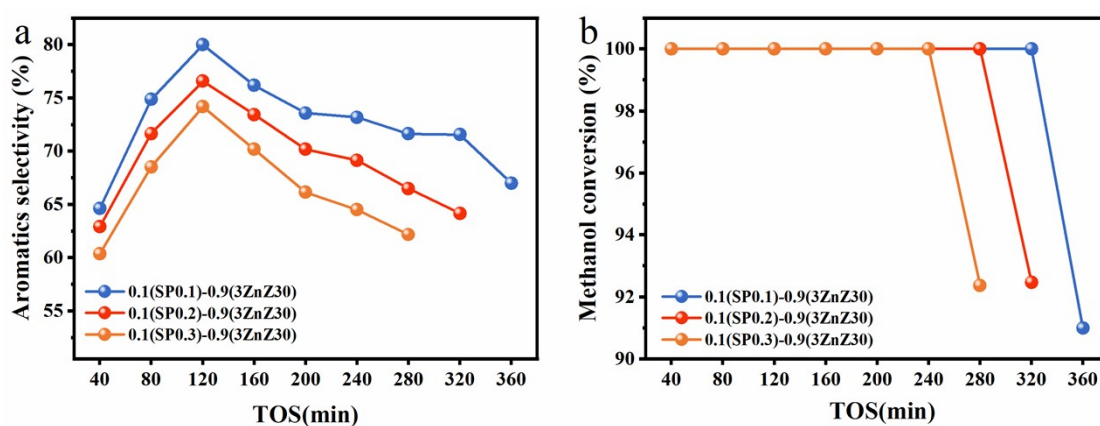

Fig.S4 Effect of SAPO-34 with different acid on production capacity of  $C_{2-3}$  (a) TOS diagram of aromatics selectivity ,(b) TOS diagram of methanol conversion

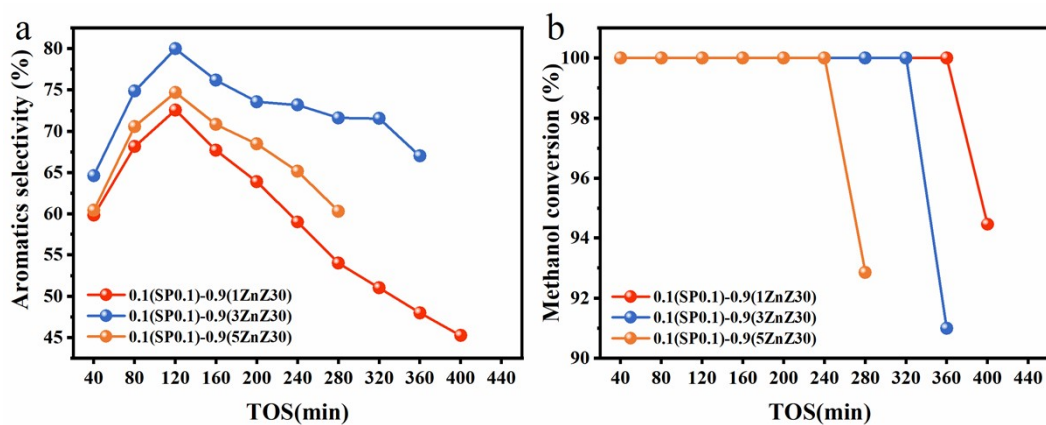

Fig.S5 Effect of ZSM-5 with different Zn loading on aromatization capacity of  $C_{2-3}$  (a) TOS diagram of aromatics selectivity ,(b) TOS diagram of methanol conversion
